## Retraction

**Retraction: Hsa-miR-875-5p exerts tumor suppressor function through down-regulation of EGFR in colorectal carcinoma (CRC)****Tiening Zhang<sup>1,\*</sup>, Xun Cai<sup>1,\*</sup>, Qi Li<sup>1</sup>, Peng Xue<sup>1</sup>, Zhixiao Chen<sup>1</sup>, Xiao Dong<sup>1</sup> and Ying Xue<sup>1</sup>**<sup>1</sup>Oncology Center, Shanghai General Hospital, Shanghai Jiaotong University, School of Medicine, Shanghai 200080, P. R. China

\*These authors contributed equally to this work

**Published:****Copyright:** © 2024 Zhang et al. This is an open access article distributed under the terms of the [Creative Commons Attribution License](#) (CC BY 4.0), which permits unrestricted use, distribution, and reproduction in any medium, provided the original author and source are credited.

**This article has been retracted:** This article contains duplicated images found in other published papers. Specifically, all eight panels of Figure 6A are duplicates of those in Figure 6A of a paper published simultaneously, both which are organized in a nearly identical way [1]. Figure 4A also contains images from Figure 4A of a second paper, published earlier [2]. Figure 2A also duplicates an image from Figure 2A of a third paper published several weeks later [3]. The data and comments provided by the authors to Oncotarget did not resolve the concerns about the integrity and reliability of the reported data. Therefore, the Scientific Integrity office at Oncotarget has decided to retract this paper.

Original article: Oncotarget. 2016; 7:42225–42240. <https://doi.org/10.18632/oncotarget.9944>**REFERENCES**

1. Sun CC, Li SJ, Li DJ. Hsa-miR-134 suppresses non-small cell lung cancer (NSCLC) development through down-regulation of CCND1. Oncotarget. 2016; 7:35960–78. <https://doi.org/10.18632/oncotarget.8482>. [PubMed]
2. Sun C, Li S, Yang C, Xi Y, Wang L, Zhang F, Li D. MicroRNA-187-3p mitigates non-small cell lung cancer (NSCLC) development through down-regulation of BCL6. Biochem Biophys Res Commun. 2016; 471:82–88. <https://doi.org/10.1016/j.bbrc.2016.01.175>. [PubMed]
3. Mao M, Wu Z, Chen J. MicroRNA-187-5p suppresses cancer cell progression in non-small cell lung cancer (NSCLC) through down-regulation of CYP1B1. Biochem Biophys Res Commun. 2016; 478:649–55. <https://doi.org/10.1016/j.bbrc.2016.08.001>. [PubMed]
